# Supplementary material for: Unifying soil organic matter formation and persistence frameworks: the MEMS model
Source: Copernicus journal article supplement (doi:10.5194/bg-2018-430), 2018-10-17
Supplement: Supplementary file 1 [file bg-2018-430-supplement.zip]

Archive with 6 entries (6 files):
- Robertson et al (2018) BGD_SUPP MEMS model description.pdf
- Robertson_BGD_FigS1.pdf
- Robertson_BGD_FigS2.pdf
- Robertson_BGD_FigS3.pdf
- Robertson_BGD_FigS4.pdf
- Robertson_BGD_FigS5.png
