# Supplementary material for: Unifying soil organic matter formation and persistence frameworks: the MEMS model
Source: Copernicus journal article supplement (doi:10.5194/bg-2018-430), 2018-10-17

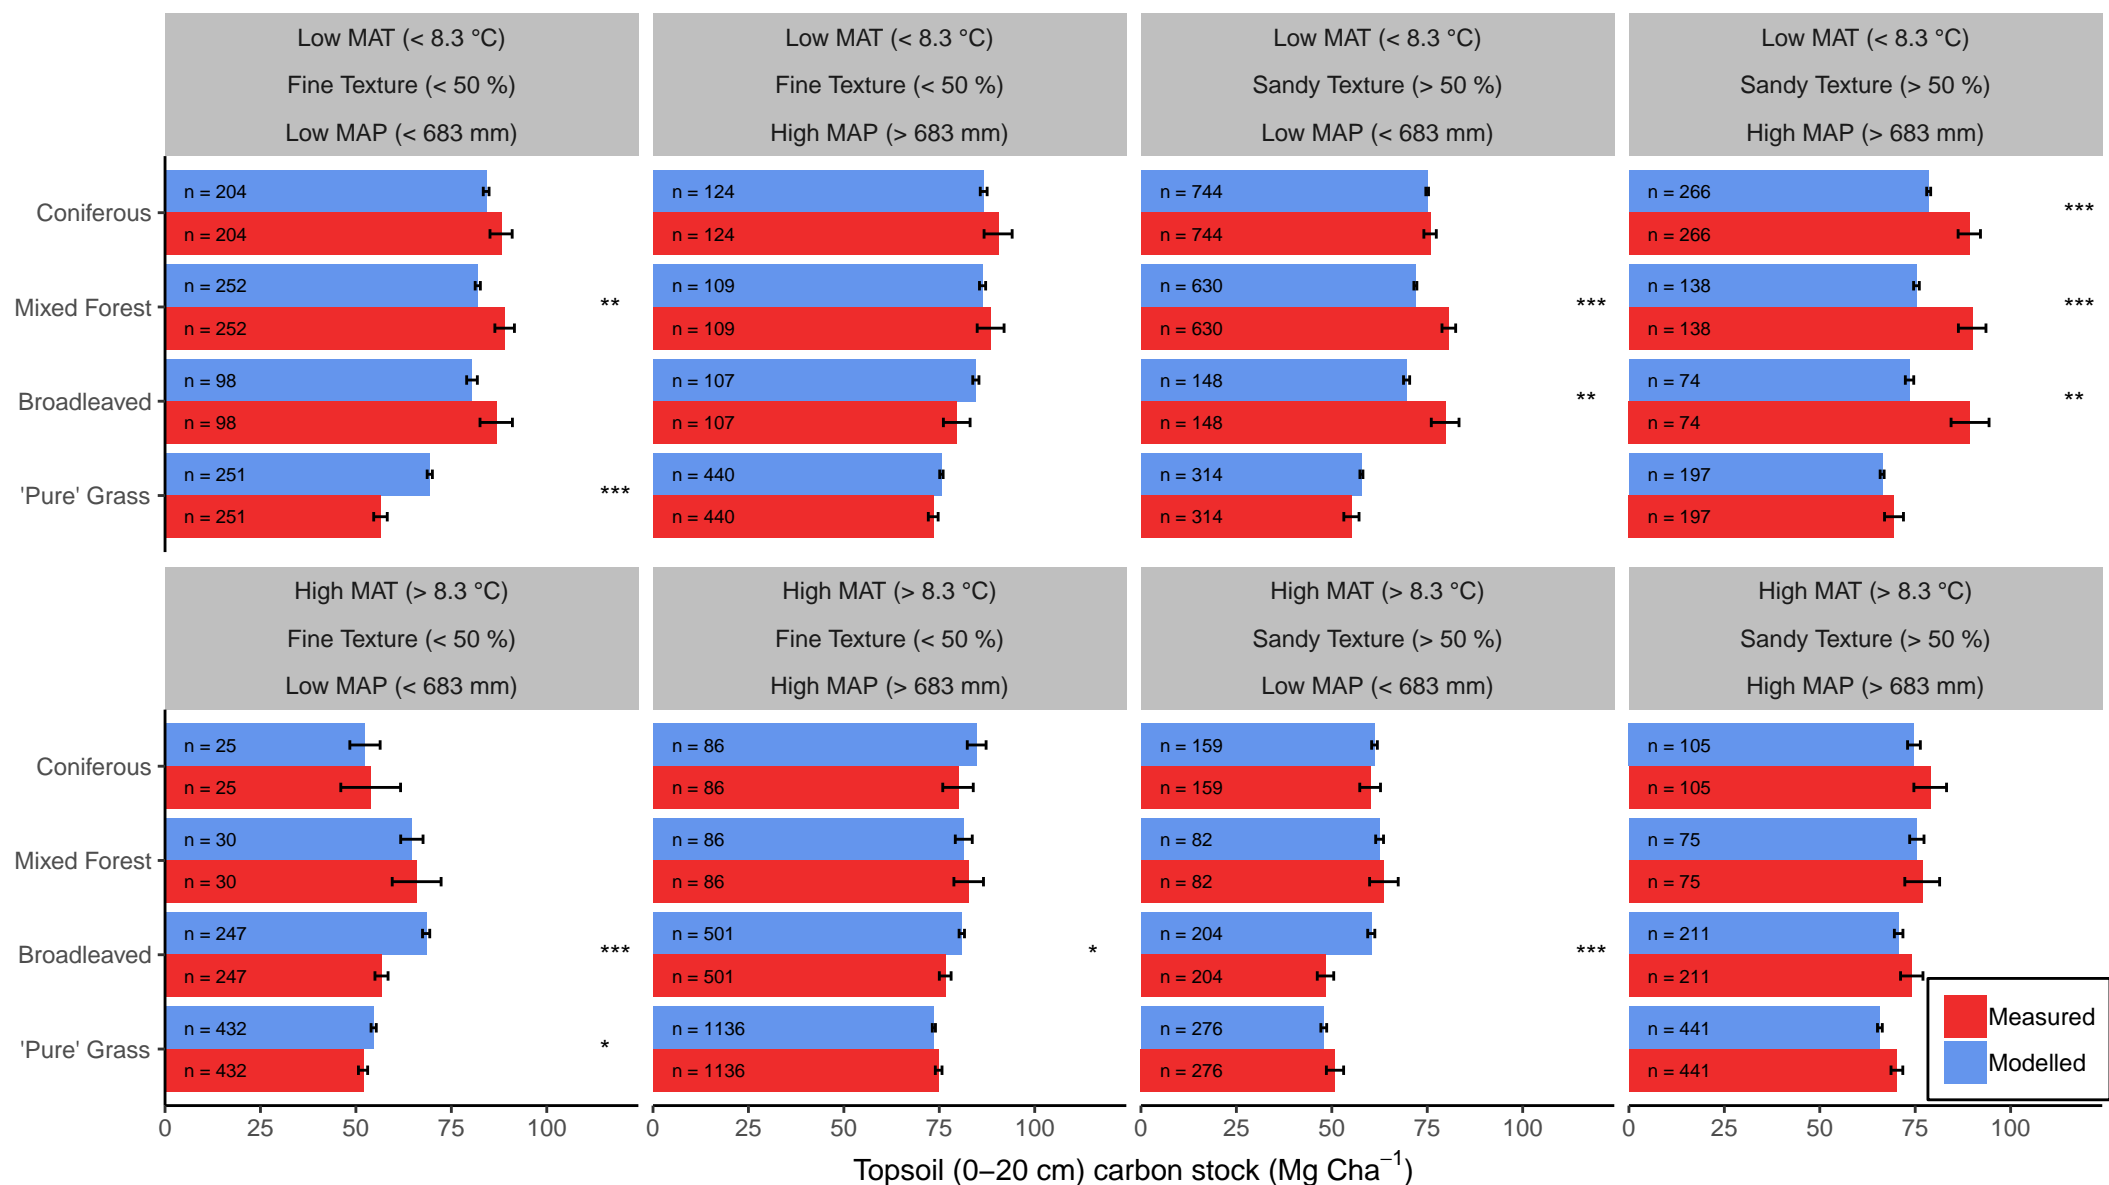

Supplement: Supplementary file [file Robertson_et_al_Figure6.pdf › Robertson_et_al_Figure6.pdf]
