# Supplementary figures and images for: Unifying soil organic matter formation and persistence frameworks: the MEMS model
Source: Copernicus journal article supplement (doi:10.5194/bg-2018-430), 2018-10-17

Sand (%)

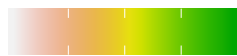

25 50 75

Annual Cin (gC/m2)

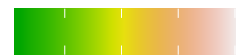

500 1000 1500 2000

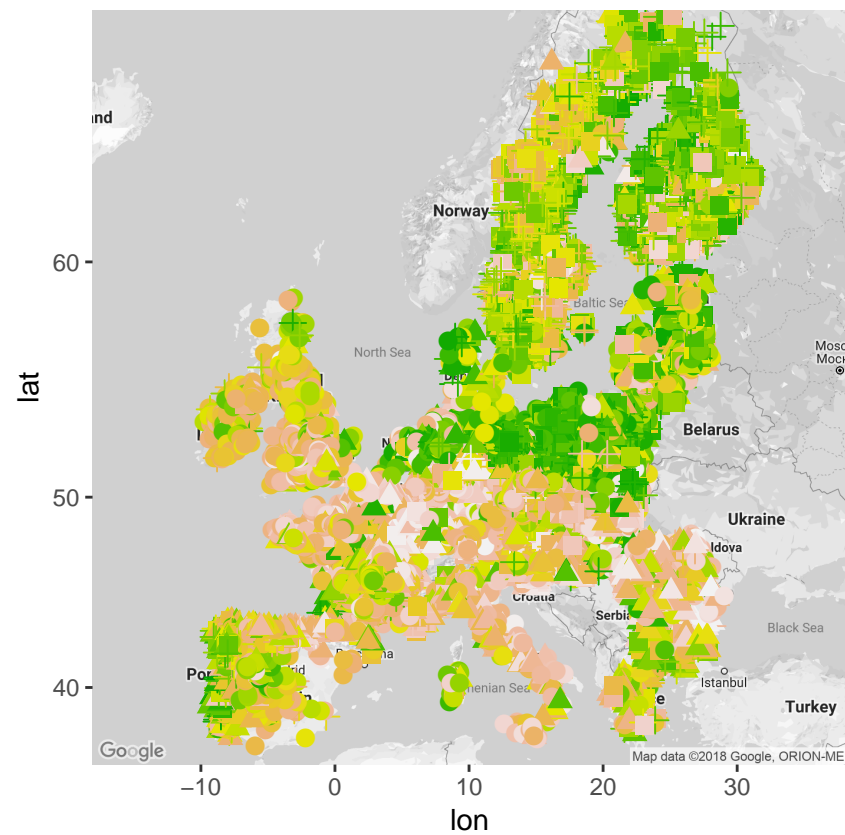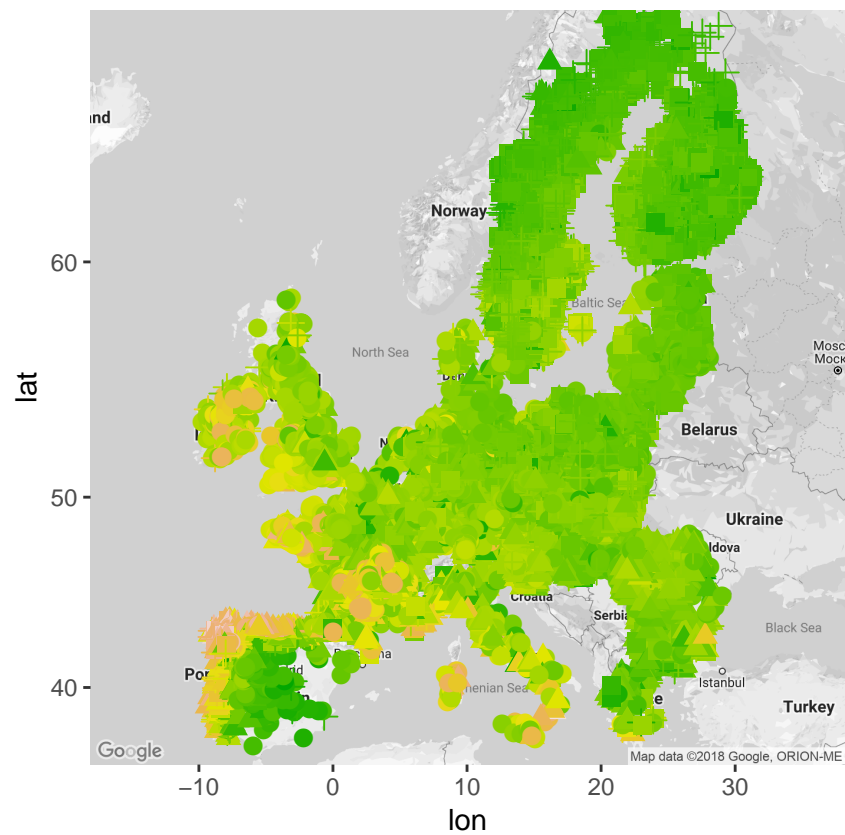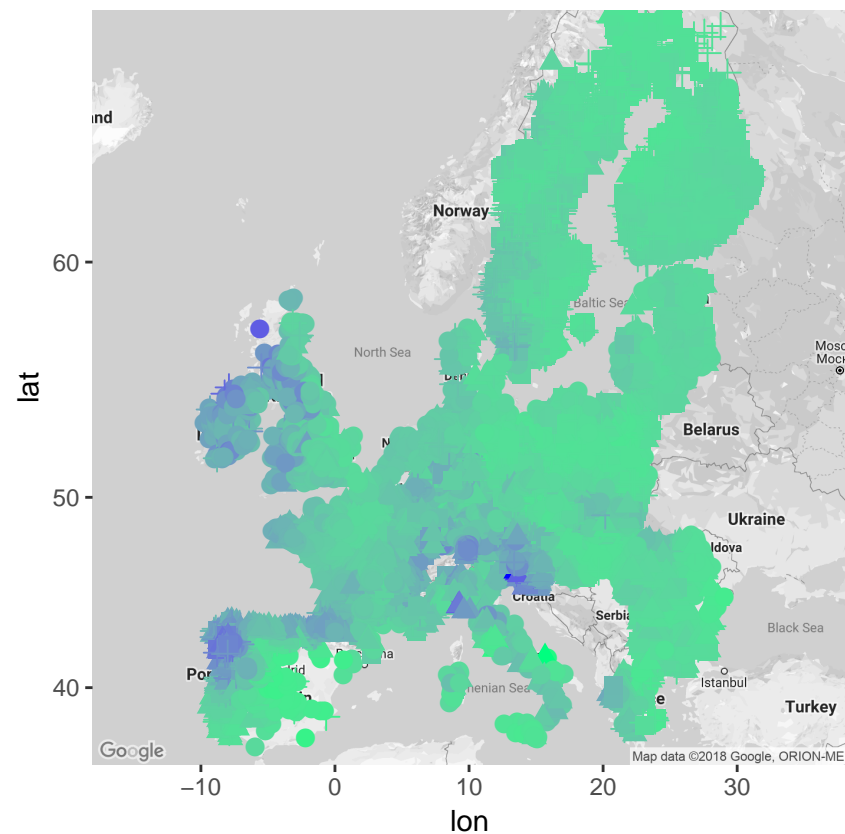

MAP (mm)

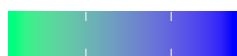

1000 2000

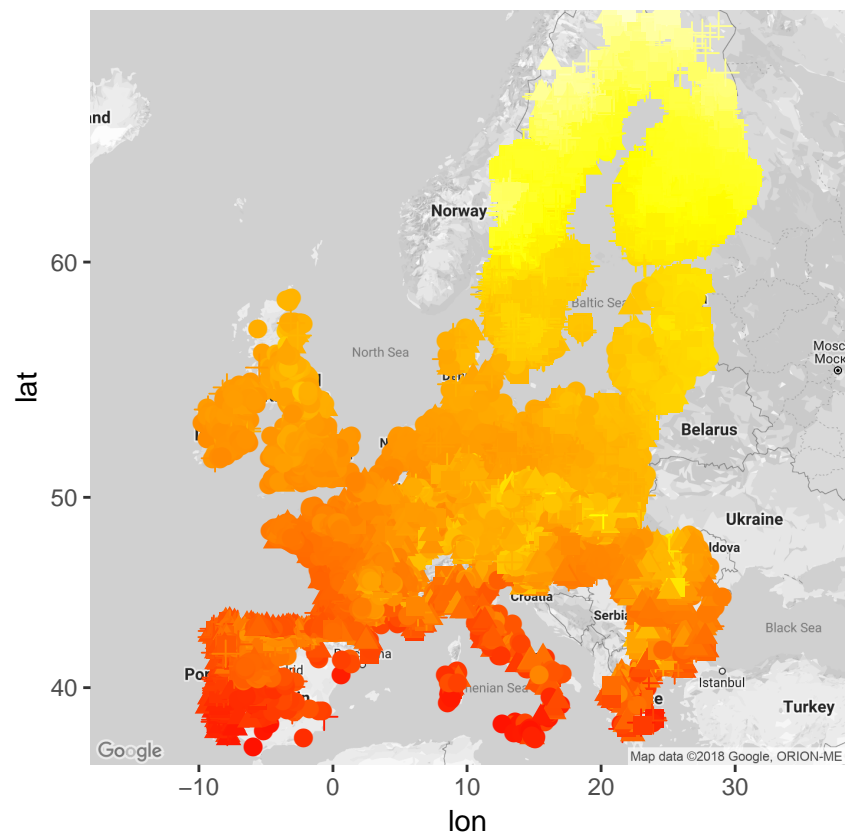

MAT (DegC)

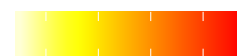

0 5 10 15

Supplement: Supplementary file 1 [file bg-2018-430-supplement.zip › Robertson_BGD_FigS1.pdf]

Sand (%)

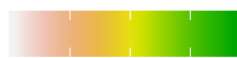

25 50 75

LandUse

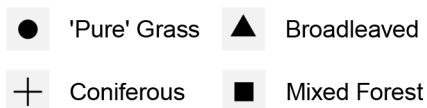

Annual Cin (gC/m2)

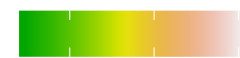

500 1000 1500

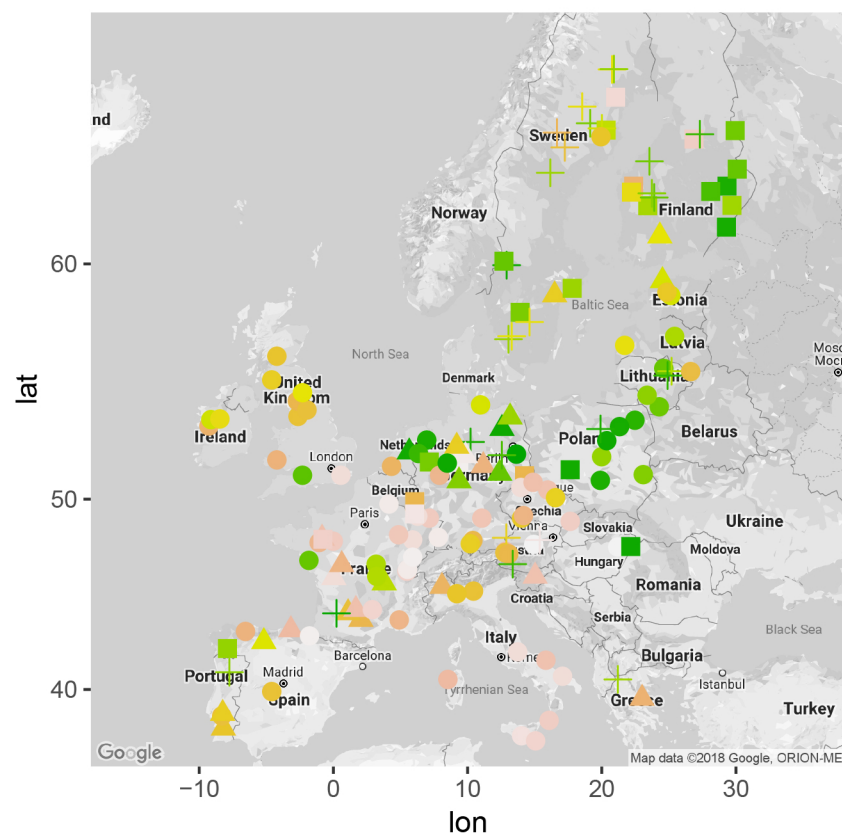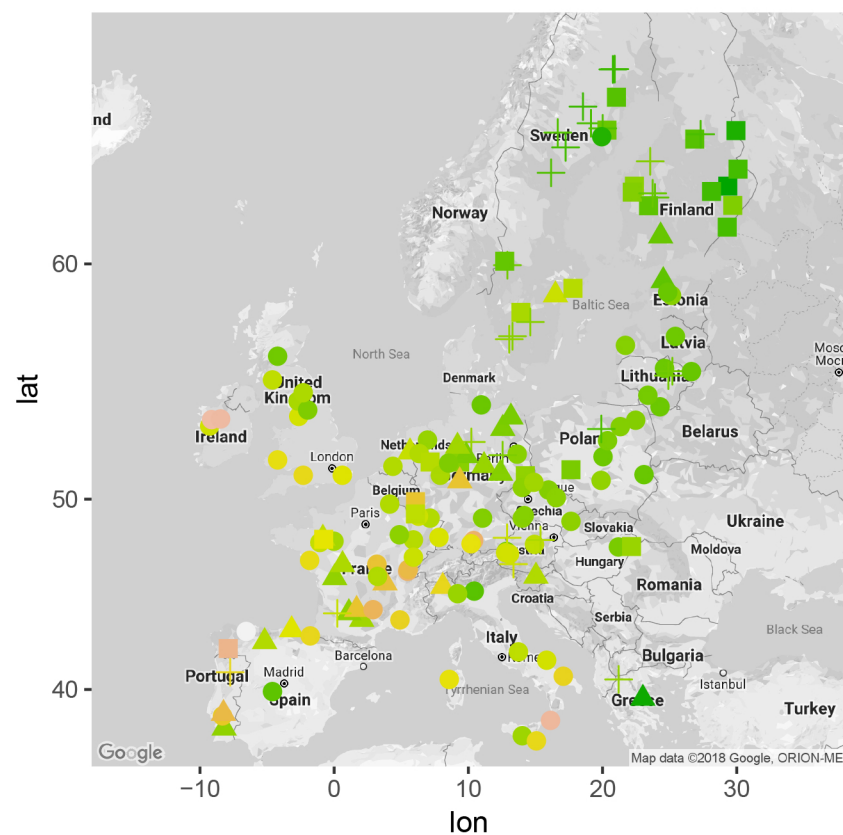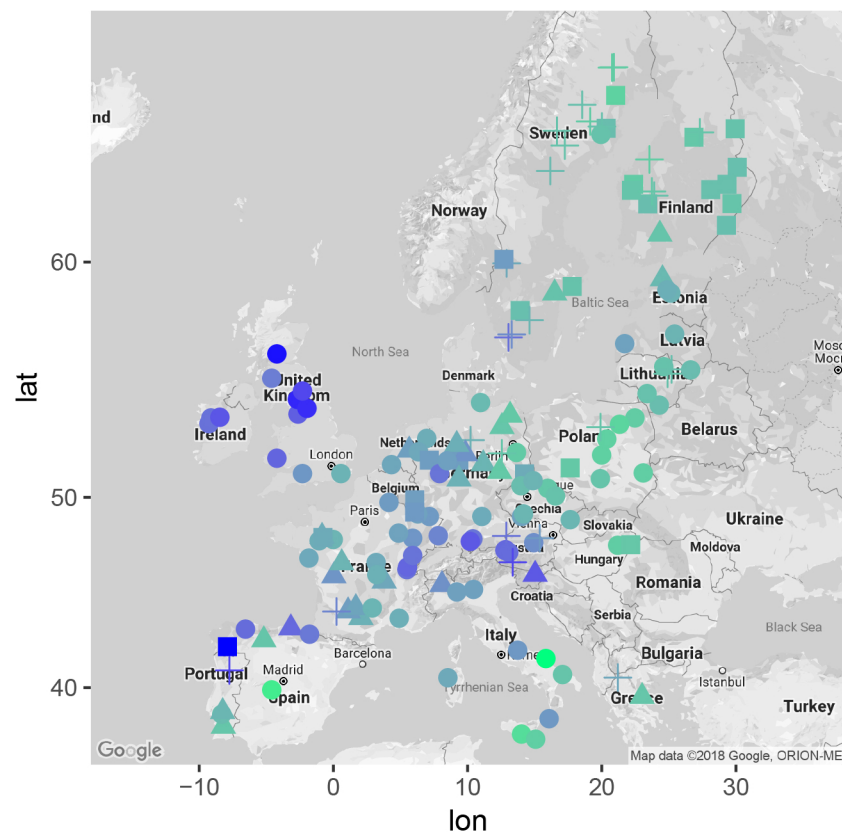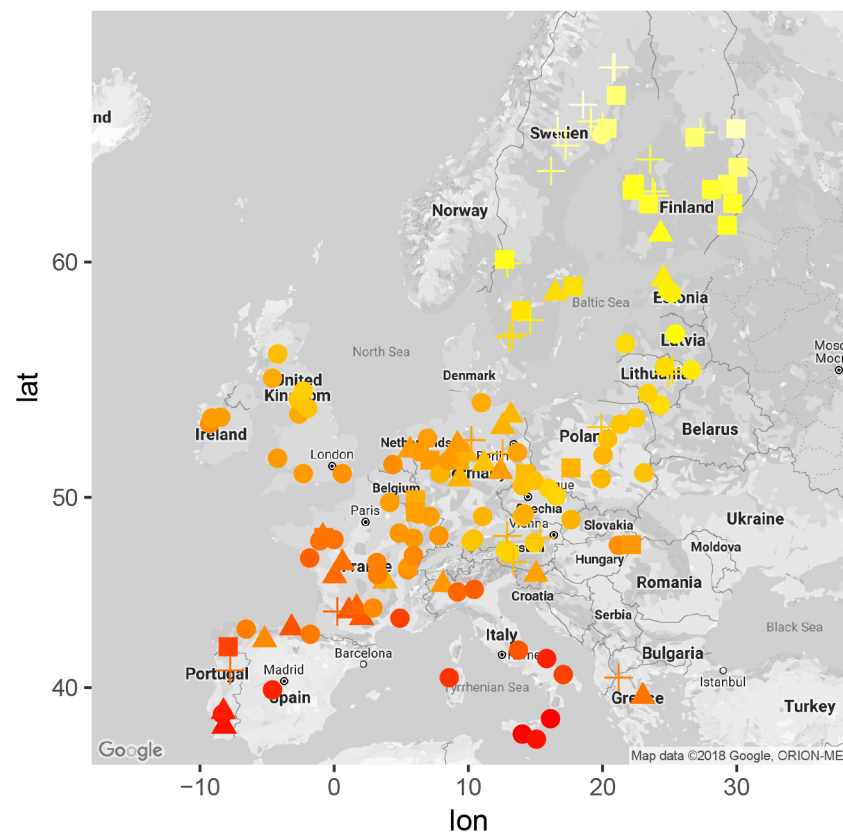

MAP (mm)

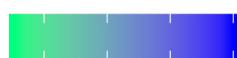

400 800 1200 1600

MAT (DegC)

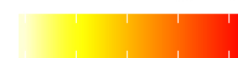

0 4 8 12 16

Supplement: Supplementary file 1 [file bg-2018-430-supplement.zip › Robertson_BGD_FigS2.pdf]

Variable scale (see facet titles for units)

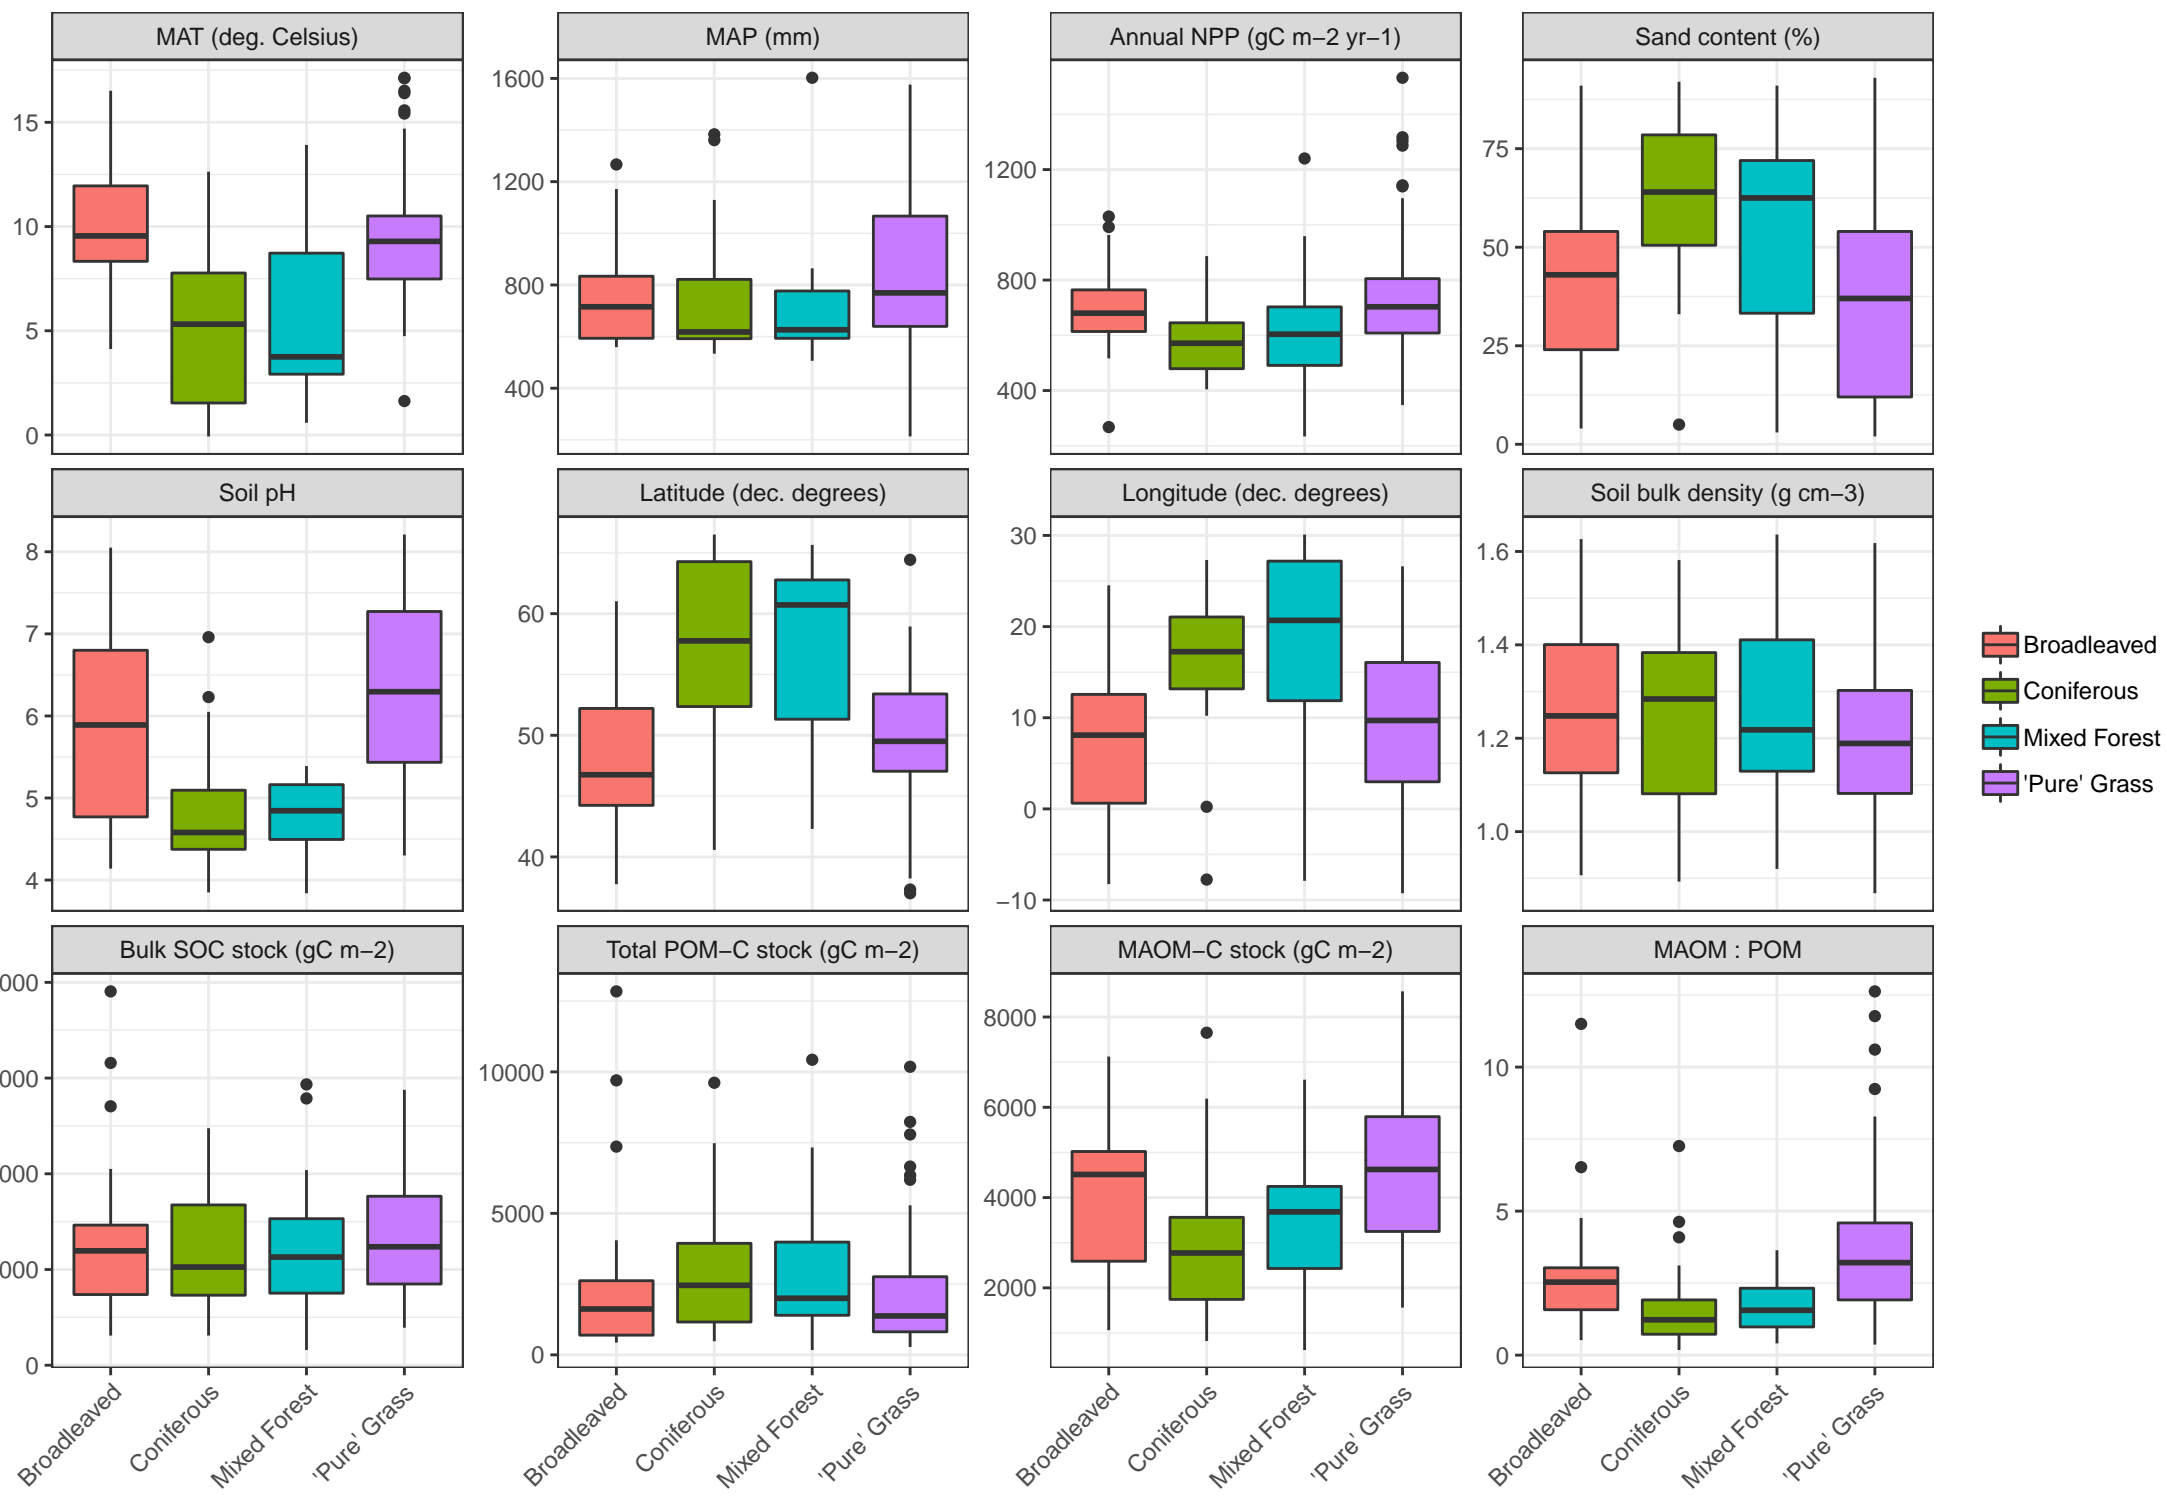

Supplement: Supplementary file 1 [file bg-2018-430-supplement.zip › Robertson_BGD_FigS3.pdf]

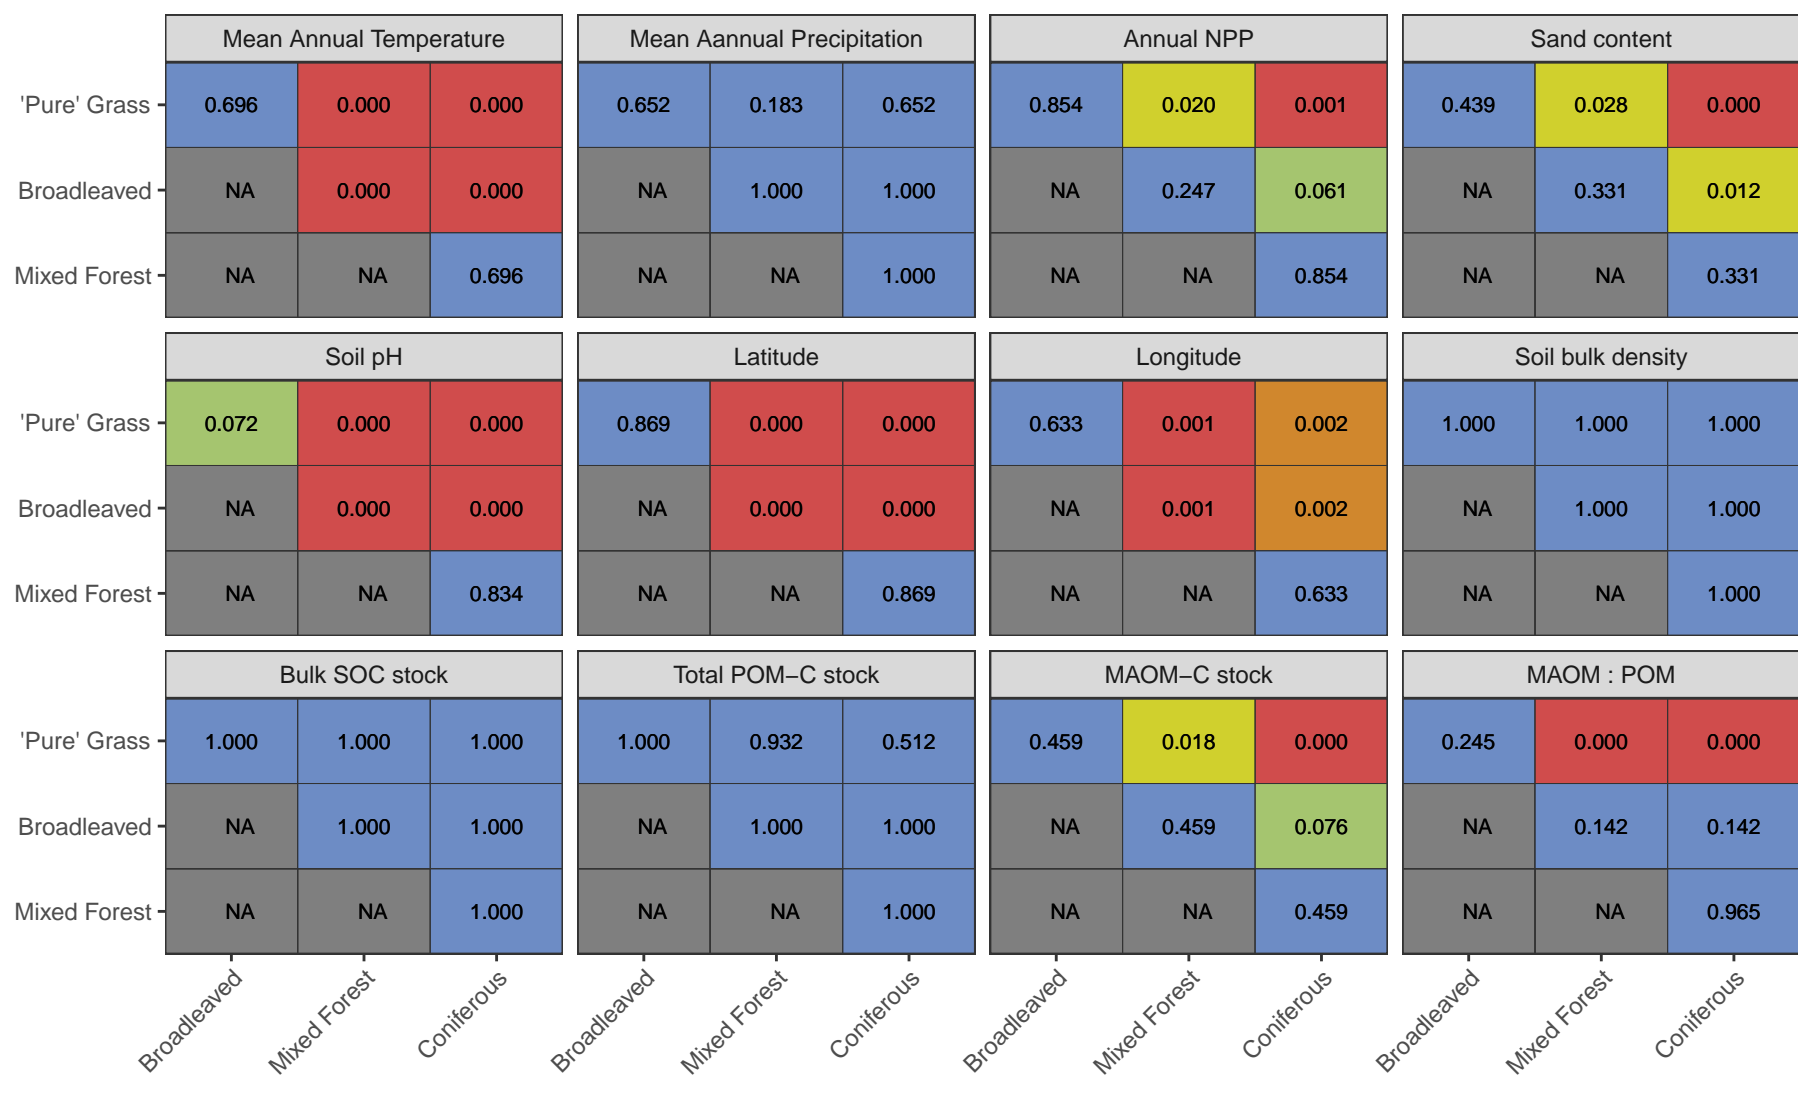

Supplement: Supplementary file 1 [file bg-2018-430-supplement.zip › Robertson_BGD_FigS4.pdf]

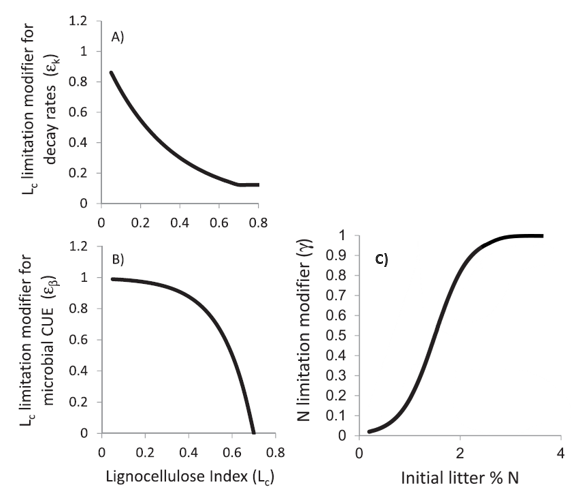

Supplement: Supplementary file 1 [file bg-2018-430-supplement.zip › Robertson_BGD_FigS5.png]
